# Supplementary material for: Bronchoalveolar Lavage Cytology in Severe Equine Asthma Syndrome During Asymptomatic, Exacerbation, and Remission Phase: Cytocentrifugated Versus Sedimented Smear Preparations
Source: Preprints.org preprint supplement (doi:10.20944/preprints202306.1264.v1), 2023-06-19
Supplement: Supplementary file 1 [file supplementary]

**Table S1**. Raw data of cytocentrifugate and smear cell count results at T0.

| **T0** | | | | | | | | | |
| --- | --- | --- | --- | --- | --- | --- | --- | --- | --- |
| **Horse 1** | | **1st field** | **2nd field** | **3rd field** | **4th field** | **5th field** | **Mean** | **%** | **Mucus** |
| Cytospin | Neutrophils | 52 | 54 | 57 | 52 | 48 | 53 | 56 | 1 |
| Mast cells | 1 | 0 | 0 | 0 | 0 | 0.2 | 0 |
| Lymphocytes | 26 | 25 | 22 | 31 | 33 | 27 | 28 |
| Macrophages | 14 | 16 | 14 | 16 | 15 | 15 | 16 |
| Eosinophils | 0 | 0 | 0 | 0 | 0 | 0 | 0 |
| Smear | Neutrophils | bd | bd | bd | bd | bd | bd | bd | bd |
| Mast cells | bd | bd | bd | bd | bd | bd | bd |
| Lymphocytes | bd | bd | bd | bd | bd | bd | bd |
| Macrophages | bd | bd | bd | bd | bd | bd | bd |
| Eosinophils | bd | bd | bd | bd | bd | bd | bd |
| **Horse 2** | | **1st field** | **2nd field** | **3rd field** | **4th field** | **5th field** | **Mean** | **%** | **Mucus** |
| Cytospin | Neutrophils | 5 | 12 | 7 | 12 | 13 | 13 | 23 | 0 |
| Mast cells | 0 | 0 | 0 | 0 | 0 | 0 | 0 |
| Lymphocytes | 24 | 27 | 22 | 25 | 23 | 24 | 56 |
| Macrophages | 15 | 10 | 7 | 6 | 8 | 9 | 21 |
| Eosinophils | 0 | 0 | 0 | 0 | 0 | 0 | 0 |
| Smear | Neutrophils | 22 | 42 | 53 | 31 | 47 | 39 | 24 | 3 |
| Mast cells | 0 | 0 | 0 | 0 | 0 | 0 | 0 |
| Lymphocytes | 76 | 14 | 25 | 45 | 20 | 36 | 31 |
| Macrophages | 52 | 43 | 41 | 24 | 40 | 40 | 35 |
| Eosinophils | 0 | 0 | 0 | 0 | 0 | 0 | 0 |
| **Horse 3** | | **1st field** | **2nd field** | **3rd field** | **4th field** | **5th field** | **Mean** | **%** | **Mucus** |
| Cytospin | Neutrophils | 43 | 51 | 57 | 53 | 49 | 51 | 55 | 1 |
| Mast cells | 0 | 0 | 0 | 0 | 0 | 0 | 0 |
| Lymphocytes | 19 | 23 | 13 | 19 | 10 | 17 | 19 |
| Macrophages | 25 | 16 | 26 | 28 | 25 | 24 | 26 |
| Eosinophils | 0 | 0 | 0 | 0 | 0 | 0 | 0 |
| Smear | Neutrophils | 31 | 82 | 108 | 105 | 94 | 84 | 71 | 1 |
| Mast cells | 0 | 0 | 0 | 0 | 0 | 0 | 0 |
| Lymphocytes | 26 | 8 | 11 | 6 | 11 | 12 | 10 |
| Macrophages | 23 | 21 | 28 | 21 | 18 | 22 | 19 |
| Eosinophils | 0 | 0 | 0 | 0 | 0 | 0 | 0 |
| **Horse 4** | | **1st field** | **2nd field** | **3rd field** | **4th field** | **5th field** | **Mean** | **%** | **Mucus** |
| Cytospin | Neutrophils | 5 | 6 | 7 | 5 | 5 | 6 | 14 | 0 |
| Mast cells | 0 | 0 | 0 | 0 | 0 | 0 | 0 |
| Lymphocytes | 21 | 18 | 22 | 23 | 20 | 21 | 49 |
| Macrophages | 18 | 16 | 11 | 18 | 17 | 16 | 37 |
| Eosinophils | 0 | 0 | 0 | 0 | 0 | 0 | 0 |
| Smear | Neutrophils | bd | bd | bd | bd | bd | bd | bd | bd |
| Mast cells | bd | bd | bd | bd | bd | bd | bd |
| Lymphocytes | bd | bd | bd | bd | bd | bd | bd |
| Macrophages | bd | bd | bd | bd | bd | bd | bd |
| Eosinophils | bd | bd | bd | bd | bd | bd | bd |
| **Horse 5** | | **1st field** | **2nd field** | **3rd field** | **4th field** | **5th field** | **Mean** | **%** | **Mucus** |
| Cytospin | Neutrophils | bd | bd | bd | bd | bd | bd | bd | bd |
| Mast cells | bd | bd | bd | bd | bd | bd | bd |
| Lymphocytes | bd | bd | bd | bd | bd | bd | bd |
| Macrophages | bd | bd | bd | bd | bd | bd | bd |
| Eosinophils | bd | bd | bd | bd | bd | bd | bd |
| Smear | Neutrophils | 6 | 3 | 3 | 0 | 2 | 3 | 13 | 0 |
| Mast cells | 0 | 0 | 0 | 0 | 0 | 0 | 0 |
| Lymphocytes | 5 | 11 | 15 | 16 | 20 | 13 | 54 |
| Macrophages | 5 | 9 | 6 | 15 | 7 | 8 | 33 |
| Eosinophils | 0 | 0 | 0 | 0 | 0 | 0 | 0 |
| **Horse 6** | | **1st field** | **2nd field** | **3rd field** | **4th field** | **5th field** | **Mean** | **%** | **Mucus** |
| Cytospin | Neutrophils | 20 | 33 | 22 | 19 | 28 | 24 | 39 | 2 |
| Mast cells | 0 | 0 | 0 | 0 | 0 | 0 | 0 |
| Lymphocytes | 25 | 22 | 19 | 24 | 26 | 23 | 38 |
| Macrophages | 14 | 15 | 21 | 10 | 11 | 14 | 23 |
| Eosinophils | 0 | 0 | 0 | 0 | 0 | 0 | 0 |
| Smear | Neutrophils | 65 | 44 | 60 | 40 | 38 | 49 | 52 | 3 |
| Mast cells | 0 | 0 | 0 | 0 | 0 | 0 | 0 |
| Lymphocytes | 12 | 41 | 15 | 17 | 22 | 21 | 22 |
| Macrophages | 25 | 31 | 25 | 23 | 15 | 24 | 26 |
| Eosinophils | 0 | 0 | 0 | 0 | 0 | 0 | 0 |

**Table S2**. Raw data of cytocentrifugate and smear cell count results at T1.

| **T1** | | | | | | | | | |
| --- | --- | --- | --- | --- | --- | --- | --- | --- | --- |
| **Horse 1** | | **1st field** | **2nd field** | **3rd field** | **4th field** | **5th field** | **Mean** | **%** | **Mucus** |
| Cytospin | Neutrophils | 3 | 17 | 17 | 21 | 19 | 17 | 30 | 1 |
| Mast cells | 0 | 0 | 0 | 1 | 0 | 0.2 | 0 |
| Lymphocytes | 28 | 27 | 28 | 32 | 30 | 29 | 52 |
| Macrophages | 5 | 10 | 13 | 10 | 11 | 10 | 18 |
| Eosinophils | 0 | 0 | 0 | 0 | 0 | 0 | 0 |
| Smear | Neutrophils | 112 | 142 | 155 | 115 | 100 | 125 | 70 | 3 |
| Mast cells | 0 | 0 | 0 | 0 | 0 | 0 | 0 |
| Lymphocytes | 35 | 45 | 42 | 37 | 37 | 39 | 22 |
| Macrophages | 14 | 18 | 13 | 15 | 15 | 15 | 8 |
| Eosinophils | 0 | 0 | 0 | 0 | 0 | 0 | 0 |
| **Horse 2** | | **1st field** | **2nd field** | **3rd field** | **4th field** | **5th field** | **Mean** | **%** | **Mucus** |
| Cytospin | Neutrophils | 16 | 22 | 19 | 23 | 20 | 20 | 27 | 1 |
| Mast cells | 0 | 0 | 1 | 0 | 0 | 0 | 0.2 |
| Lymphocytes | 38 | 39 | 41 | 39 | 35 | 38 | 52 |
| Macrophages | 10 | 16 | 14 | 18 | 15 | 15 | 21 |
| Eosinophils | 0 | 0 | 0 | 0 | 0 | 0 | 0 |
| Smear | Neutrophils | 33 | 35 | 37 | 42 | 40 | 38 | 36 | 3 |
| Mast cells | 0 | 0 | 0 | 1 | 0 | 0.2 | 0 |
| Lymphocytes | 36 | 13 | 16 | 22 | 20 | 21 | 20 |
| Macrophages | 45 | 50 | 57 | 40 | 45 | 47 | 44 |
| Eosinophils | 0 | 0 | 0 | 0 | 0 | 0 | 0 |
| **Horse 3** | | **1st field** | **2nd field** | **3rd field** | **4th field** | **5th field** | **Mean** | **%** | **Mucus** |
| Cytospin | Neutrophils | bd | bd | bd | bd | bd | bd | bd | bd |
| Mast cells | bd | bd | bd | bd | bd | bd | bd |
| Lymphocytes | bd | bd | bd | bd | bd | bd | bd |
| Macrophages | bd | bd | bd | bd | bd | bd | bd |
| Eosinophils | bd | bd | bd | bd | bd | bd | bd |
| Smear | Neutrophils | bd | bd | bd | bd | bd | bd | bd | bd |
| Mast cells | bd | bd | bd | bd | bd | bd | bd |
| Lymphocytes | bd | bd | bd | bd | bd | bd | bd |
| Macrophages | bd | bd | bd | bd | bd | bd | bd |
| Eosinophils | bd | bd | bd | bd | bd | bd | bd |
| **Horse 4** | | **1st field** | **2nd field** | **3rd field** | **4th field** | **5th field** | **Mean** | **%** | **Mucus** |
| Cytospin | Neutrophils | 85 | 80 | 79 | 65 | 60 | 74 | 68 | 2 |
| Mast cells | 0 | 0 | 0 | 0 | 0 | 0 | 0 |
| Lymphocytes | 23 | 20 | 10 | 7 | 19 | 16 | 15 |
| Macrophages | 18 | 20 | 17 | 14 | 25 | 19 | 17 |
| Eosinophils | 0 | 0 | 0 | 0 | 0 | 0 | 0 |
| Smear | Neutrophils | 185 | 152 | 165 | 180 | 170 | 170 | 90 | 3 |
| Mast cells | 0 | 0 | 0 | 0 | 0 | 0 | 0 |
| Lymphocytes | 17 | 5 | 5 | 8 | 7 | 8 | 4 |
| Macrophages | 11 | 14 | 13 | 10 | 11 | 12 | 6 |
| Eosinophils | 0 | 0 | 0 | 0 | 0 | 0 | 0 |
| **Horse 5** | | **1st field** | **2nd field** | **3rd field** | **4th field** | **5th field** | **Mean** | **%** | **Mucus** |
| Cytospin | Neutrophils | 47 | 52 | 54 | 48 | 50 | 50 | 54 | 1 |
| Mast cells | 0 | 0 | 0 | 0 | 0 | 0 | 0 |
| Lymphocytes | 28 | 33 | 30 | 27 | 29 | 29 | 31 |
| Macrophages | 16 | 14 | 13 | 14 | 15 | 14 | 15 |
| Eosinophils | 0 | 0 | 0 | 0 | 0 | 0 | 0 |
| Smear | Neutrophils | 33 | 40 | 43 | 41 | 39 | 39 | 47 | 3 |
| Mast cells | 0 | 0 | 0 | 0 | 0 | 0 | 0 |
| Lymphocytes | 36 | 43 | 39 | 38 | 37 | 39 | 46 |
| Macrophages | 5 | 6 | 7 | 5 | 6 | 6 | 7 |
| Eosinophils | 0 | 0 | 0 | 0 | 0 | 0 | 0 |
| **Horse 6** | | **1st field** | **2nd field** | **3rd field** | **4th field** | **5th field** | **Mean** | **%** | **Mucus** |
| Cytospin | Neutrophils | bd | bd | bd | bd | bd | bd | bd | bd |
| Mast cells | bd | bd | bd | bd | bd | bd | bd |
| Lymphocytes | bd | bd | bd | bd | bd | bd | bd |
| Macrophages | bd | bd | bd | bd | bd | bd | bd |
| Eosinophils | bd | bd | bd | bd | bd | bd | bd |
| Smear | Neutrophils | bd | bd | bd | bd | bd | bd | bd | bd |
| Mast cells | bd | bd | bd | bd | bd | bd | bd |
| Lymphocytes | bd | bd | bd | bd | bd | bd | bd |
| Macrophages | bd | bd | bd | bd | bd | bd | bd |
| Eosinophils | bd | bd | bd | bd | bd | bd | bd |

**Table S3**. Raw data of cytocentrifugate and smear cell count results at T2.

| **T2** | | | | | | | | | |
| --- | --- | --- | --- | --- | --- | --- | --- | --- | --- |
| **Horse 1** | | **1st field** | **2nd field** | **3rd field** | **4th field** | **5th field** | **Mean** | **%** | **Mucus** |
| Cytospin | Neutrophils | 7 | 7 | 9 | 10 | 8 | 8 | 23 | 0 |
| Mast cells | 0 | 0 | 0 | 0 | 0 | 0 | 0 |
| Lymphocytes | 18 | 25 | 21 | 26 | 22 | 22 | 63 |
| Macrophages | 5 | 7 | 4 | 5 | 4 | 5 | 14 |
| Eosinophils | 0 | 0 | 0 | 0 | 0 | 0 | 0 |
| Smear | Neutrophils | 7 | 6 | 8 | 9 | 10 | 8 | 20 | 0 |
| Mast cells | 0 | 0 | 0 | 0 | 0 | 0 | 0 |
| Lymphocytes | 24 | 27 | 29 | 28 | 28 | 27 | 68 |
| Macrophages | 3 | 9 | 4 | 3 | 4 | 5 | 12 |
| Eosinophils | 0 | 0 | 0 | 0 | 0 | 0 | 0 |
| **Horse 2** | | **1st field** | **2nd field** | **3rd field** | **4th field** | **5th field** | **Mean** | **%** | **Mucus** |
| Cytospin | Neutrophils | 15 | 18 | 20 | 14 | 15 | 16 | 14 | 2 |
| Mast cells | 0 | 0 | 0 | 0 | 1 | 0.2 | 0 |
| Lymphocytes | 58 | 60 | 61 | 57 | 59 | 59 | 51 |
| Macrophages | 41 | 45 | 42 | 38 | 40 | 41 | 35 |
| Eosinophils | 0 | 0 | 0 | 0 | 0 | 0 | 0 |
| Smear | Neutrophils | 5 | 6 | 6 | 5 | 2 | 5 | 8 | 3 |
| Mast cells | 0 | 0 | 0 | 0 | 0 | 0 | 0 |
| Lymphocytes | 29 | 35 | 36 | 43 | 26 | 34 | 56 |
| Macrophages | 20 | 19 | 28 | 25 | 19 | 22 | 36 |
| Eosinophils | 0 | 0 | 0 | 0 | 0 | 0 | 0 |
| **Horse 3** | | **1st field** | **2nd field** | **3rd field** | **4th field** | **5th field** | **Mean** | **%** | **Mucus** |
| Cytospin | Neutrophils | 132 | 130 | 124 | 139 | 127 | 130 | 60 | 2 |
| Mast cells | 1 | 0 | 0 | 0 | 0 | 0.2 | 0 |
| Lymphocytes | 40 | 41 | 37 | 43 | 42 | 41 | 19 |
| Macrophages | 42 | 39 | 43 | 49 | 45 | 44 | 21 |
| Eosinophils | 0 | 0 | 0 | 0 | 0 | 0 | 0 |
| Smear | Neutrophils | bd | bd | bd | bd | bd | bd | bd | bd |
| Mast cells | bd | bd | bd | bd | bd | bd | bd |
| Lymphocytes | bd | bd | bd | bd | bd | bd | bd |
| Macrophages | bd | bd | bd | bd | bd | bd | bd |
| Eosinophils | bd | bd | bd | bd | bd | bd | bd |
| **Horse 4** | | **1st field** | **2nd field** | **3rd field** | **4th field** | **5th field** | **Mean** | **%** | **Mucus** |
| Cytospin | Neutrophils | 10 | 19 | 16 | 22 | 20 | 17 | 21 | 0 |
| Mast cells | 0 | 0 | 0 | 0 | 0 | 0 | 0 |
| Lymphocytes | 43 | 51 | 53 | 45 | 49 | 48 | 58 |
| Macrophages | 14 | 17 | 20 | 19 | 14 | 17 | 21 |
| Eosinophils | 0 | 0 | 0 | 0 | 0 | 0 | 0 |
| Smear | Neutrophils | 28 | 25 | 27 | 35 | 38 | 31 | 25 | 0 |
| Mast cells | 0 | 0 | 0 | 0 | 0 | 0 | 0 |
| Lymphocytes | 64 | 62 | 69 | 71 | 63 | 66 | 52 |
| Macrophages | 32 | 24 | 30 | 31 | 28 | 29 | 23 |
| Eosinophils | 0 | 0 | 0 | 0 | 0 | 0 | 0 |
| **Horse 5** | | **1st field** | **2nd field** | **3rd field** | **4th field** | **5th field** | **Mean** | **%** | **Mucus** |
| Cytospin | Neutrophils | 17 | 15 | 11 | 18 | 19 | 16 | 18 | 2 |
| Mast cells | 0 | 2 | 0 | 0 | 0 | 0.4 | 1 |
| Lymphocytes | 44 | 42 | 49 | 39 | 48 | 44 | 49 |
| Macrophages | 28 | 31 | 31 | 30 | 28 | 30 | 32 |
| Eosinophils | 0 | 0 | 0 | 0 | 0 | 0 | 0 |
| Smear | Neutrophils | 3 | 1 | 2 | 1 | 1 | 2 | 9 | 0 |
| Mast cells | 0 | 0 | 1 | 0 | 0 | 0.2 | 1 |
| Lymphocytes | 15 | 9 | 18 | 15 | 17 | 15 | 64 |
| Macrophages | 7 | 6 | 6 | 5 | 8 | 6 | 26 |
| Eosinophils | 0 | 0 | 0 | 0 | 0 | 0 | 0 |
| **Horse 6** | | **1st field** | **2nd field** | **3rd field** | **4th field** | **5th field** | **Mean** | **%** | **Mucus** |
| Cytospin | Neutrophils | 30 | 26 | 25 | 32 | 35 | 30 | 17 | 3 |
| Mast cells | 0 | 0 | 0 | 0 | 0 | 0 | 0 |
| Lymphocytes | 102 | 98 | 90 | 104 | 92 | 97 | 56 |
| Macrophages | 43 | 51 | 44 | 58 | 40 | 47 | 27 |
| Eosinophils | 0 | 0 | 0 | 0 | 0 | 0 | 0 |
| Smear | Neutrophils | bd | bd | bd | bd | bd | bd | bd | bd |
| Mast cells | bd | bd | bd | bd | bd | bd | bd |
| Lymphocytes | bd | bd | bd | bd | bd | bd | bd |
| Macrophages | bd | bd | bd | bd | bd | bd | bd |
| Eosinophils | bd | bd | bd | bd | bd | bd | bd |

**Table S4**. Raw data of cytocentrifugate and smear cell count results at T3.

| **T3** | | | | | | | | | |
| --- | --- | --- | --- | --- | --- | --- | --- | --- | --- |
| **Horse 1** | | **1st field** | **2nd field** | **3rd field** | **4th field** | **5th field** | **Mean** | **%** | **Mucus** |
| Cytospin | Neutrophils | 105 | 110 | 100 | 94 | 99 | 102 | 58 | 3 |
| Mast cells | 0 | 0 | 0 | 0 | 0 | 0 | 0 |
| Lymphocytes | 48 | 43 | 49 | 41 | 42 | 45 | 26 |
| Macrophages | 31 | 27 | 30 | 25 | 31 | 29 | 16 |
| Eosinophils | 0 | 0 | 0 | 0 | 0 | 0 | 0 |
| Smear | Neutrophils | 83 | 96 | 84 | 100 | 92 | 91 | 81 | 3 |
| Mast cells | 0 | 0 | 0 | 0 | 0 | 0 | 0 |
| Lymphocytes | 8 | 17 | 15 | 22 | 14 | 15 | 14 |
| Macrophages | 4 | 5 | 6 | 7 | 6 | 6 | 5 |
| Eosinophils | 0 | 0 | 0 | 0 | 0 | 0 | 0 |
| **Horse 2** | | **1st field** | **2nd field** | **3rd field** | **4th field** | **5th field** | **Mean** | **%** | **Mucus** |
| Cytospin | Neutrophils | 170 | 176 | 186 | 201 | 175 | 182 | 75 | 2 |
| Mast cells | 0 | 0 | 0 | 0 | 0 | 0 | 0 |
| Lymphocytes | 19 | 22 | 19 | 27 | 24 | 22 | 9 |
| Macrophages | 40 | 35 | 32 | 50 | 37 | 39 | 16 |
| Eosinophils | 0 | 0 | 0 | 0 | 0 | 0 | 0 |
| Smear | Neutrophils | 207 | 215 | 200 | 225 | 230 | 215 | 85 | 3 |
| Mast cells | 0 | 0 | 0 | 0 | 0 | 0 | 0 |
| Lymphocytes | 11 | 18 | 16 | 12 | 10 | 13 | 5 |
| Macrophages | 20 | 28 | 22 | 25 | 30 | 25 | 10 |
| Eosinophils | 0 | 0 | 0 | 0 | 0 | 0 | 0 |
| **Horse 3** | | **1st field** | **2nd field** | **3rd field** | **4th field** | **5th field** | **Mean** | **%** | **Mucus** |
| Cytospin | Neutrophils | 180 | 165 | 172 | 183 | 190 | 178 | 74 | 2 |
| Mast cells | 0 | 0 | 0 | 0 | 0 | 0 | 0 |
| Lymphocytes | 30 | 30 | 32 | 28 | 31 | 30 | 12 |
| Macrophages | 38 | 35 | 38 | 30 | 30 | 34 | 14 |
| Eosinophils | 0 | 0 | 0 | 0 | 0 | 0 | 0 |
| Smear | Neutrophils | 130 | 128 | 110 | 135 | 112 | 123 | 76 | 2 |
| Mast cells | 0 | 0 | 0 | 0 | 0 | 0 | 0 |
| Lymphocytes | 15 | 21 | 19 | 26 | 20 | 20 | 12 |
| Macrophages | 17 | 19 | 17 | 22 | 11 | 17 | 11 |
| Eosinophils | 2 | 1 | 3 | 0 | 0 | 1.2 | 1 |
| **Horse 4** | | **1st field** | **2nd field** | **3rd field** | **4th field** | **5th field** | **Mean** | **%** | **Mucus** |
| Cytospin | Neutrophils | 23 | 15 | 24 | 19 | 18 | 20 | 36 | 2 |
| Mast cells | 0 | 0 | 0 | 0 | 0 | 0 | 0 |
| Lymphocytes | 23 | 23 | 27 | 21 | 28 | 24 | 44 |
| Macrophages | 12 | 10 | 12 | 9 | 11 | 11 | 20 |
| Eosinophils | 0 | 0 | 0 | 0 | 0 | 0 | 0 |
| Smear | Neutrophils | 14 | 26 | 24 | 22 | 26 | 22 | 34 | 0 |
| Mast cells | 0 | 0 | 0 | 0 | 0 | 0 | 0 |
| Lymphocytes | 28 | 27 | 24 | 26 | 28 | 27 | 41 |
| Macrophages | 13 | 23 | 14 | 15 | 13 | 16 | 25 |
| Eosinophils | 0 | 0 | 0 | 0 | 0 | 0 | 0 |
| **Horse 5** | | **1st field** | **2nd field** | **3rd field** | **4th field** | **5th field** | **Mean** | **%** | **Mucus** |
| Cytospin | Neutrophils | 18 | 24 | 22 | 19 | 22 | 21 | 27 | 2 |
| Mast cells | 0 | 0 | 0 | 0 | 0 | 0 | 0 |
| Lymphocytes | 42 | 39 | 41 | 40 | 39 | 40 | 51 |
| Macrophages | 15 | 19 | 19 | 14 | 20 | 17 | 22 |
| Eosinophils | 0 | 0 | 0 | 0 | 0 | 0 | 0 |
| Smear | Neutrophils | 132 | 148 | 141 | 165 | 172 | 152 | 81 | 3 |
| Mast cells | 0 | 0 | 0 | 0 | 0 | 0 | 0 |
| Lymphocytes | 15 | 14 | 19 | 25 | 21 | 19 | 10 |
| Macrophages | 14 | 10 | 15 | 20 | 19 | 16 | 9 |
| Eosinophils | 0 | 0 | 0 | 0 | 0 | 0 | 0 |
| **Horse 6** | | **1st field** | **2nd field** | **3rd field** | **4th field** | **5th field** | **Mean** | **%** | **Mucus** |
| Cytospin | Neutrophils | 108 | 110 | 105 | 98 | 100 | 104 | 58 | 1 |
| Mast cells | 0 | 0 | 0 | 0 | 0 | 0 | 0 |
| Lymphocytes | 48 | 49 | 52 | 52 | 50 | 50 | 28 |
| Macrophages | 31 | 27 | 15 | 22 | 23 | 24 | 14 |
| Eosinophils | 0 | 0 | 0 | 0 | 0 | 0 | 0 |
| Smear | Neutrophils | 72 | 105 | 48 | 72 | 74 | 74 | 69 | 2 |
| Mast cells | 0 | 0 | 0 | 0 | 0 | 0 | 0 |
| Lymphocytes | 24 | 25 | 24 | 17 | 31 | 24 | 23 |
| Macrophages | 9 | 10 | 7 | 6 | 13 | 9 | 8 |
| Eosinophils | 0 | 0 | 0 | 0 | 0 | 0 | 0 |

**Table S5**. Raw data of cytocentrifugate and smear cell count results at T4.

| **T4** | | | | | | | | | |
| --- | --- | --- | --- | --- | --- | --- | --- | --- | --- |
| **Horse 1** | | **1st field** | **2nd field** | **3rd field** | **4th field** | **5th field** | **Mean** | **%** | **Mucus** |
| Cytospin | Neutrophils | 22 | 33 | 25 | 28 | 35 | 29 | 76 | 1 |
| Mast cells | 0 | 0 | 0 | 0 | 0 | 0 | 0 |
| Lymphocytes | 9 | 5 | 12 | 5 | 6 | 7 | 19 |
| Macrophages | 3 | 1 | 4 | 1 | 2 | 2 | 5 |
| Eosinophils | 0 | 0 | 0 | 0 | 0 | 0 | 0 |
| Smear | Neutrophils | 125 | 139 | 149 | 130 | 112 | 131 | 82 | 3 |
| Mast cells | 0 | 0 | 0 | 0 | 0 | 0 | 0 |
| Lymphocytes | 11 | 17 | 15 | 19 | 19 | 16 | 10 |
| Macrophages | 7 | 12 | 9 | 15 | 16 | 12 | 8 |
| Eosinophils | 0 | 0 | 0 | 0 | 0 | 0 | 0 |
| **Horse 2** | | **1st field** | **2nd field** | **3rd field** | **4th field** | **5th field** | **Mean** | **%** | **Mucus** |
| Cytospin | Neutrophils | 49 | 52 | 56 | 47 | 49 | 51 | 52 | 1 |
| Mast cells | 0 | 0 | 0 | 0 | 0 | 0 | 0 |
| Lymphocytes | 27 | 33 | 39 | 37 | 32 | 34 | 34 |
| Macrophages | 12 | 18 | 15 | 14 | 12 | 14 | 14 |
| Eosinophils | 0 | 0 | 0 | 0 | 0 | 0 | 0 |
| Smear | Neutrophils | bd | bd | bd | bd | bd | bd | bd | bd |
| Mast cells | bd | bd | bd | bd | bd | bd | bd |
| Lymphocytes | bd | bd | bd | bd | bd | bd | bd |
| Macrophages | bd | bd | bd | bd | bd | bd | bd |
| Eosinophils | bd | bd | bd | bd | bd | bd | bd |
| **Horse 3** | | **1st field** | **2nd field** | **3rd field** | **4th field** | **5th field** | **Mean** | **%** | **Mucus** |
| Cytospin | Neutrophils | 137 | 145 | 140 | 155 | 149 | 145 | 63 | 2 |
| Mast cells | 0 | 0 | 0 | 0 | 0 | 0 | 0 |
| Lymphocytes | 37 | 40 | 35 | 32 | 38 | 36 | 15 |
| Macrophages | 44 | 51 | 50 | 48 | 55 | 50 | 22 |
| Eosinophils | 0 | 0 | 0 | 0 | 0 | 0 | 0 |
| Smear | Neutrophils | 145 | 132 | 150 | 140 | 156 | 145 | 69 | 3 |
| Mast cells | 0 | 0 | 0 | 0 | 0 | 0 | 0 |
| Lymphocytes | 56 | 42 | 40 | 32 | 24 | 39 | 19 |
| Macrophages | 27 | 20 | 30 | 17 | 29 | 25 | 12 |
| Eosinophils | 0 | 1 | 0 | 0 | 0 | 0.2 | 0 |
| **Horse 4** | | **1st field** | **2nd field** | **3rd field** | **4th field** | **5th field** | **Mean** | **%** | **Mucus** |
| Cytospin | Neutrophils | 18 | 12 | 11 | 10 | 12 | 13 | 21 | 1 |
| Mast cells | 0 | 0 | 0 | 0 | 0 | 0 | 0 |
| Lymphocytes | 31 | 32 | 35 | 32 | 35 | 33 | 52 |
| Macrophages | 22 | 16 | 15 | 14 | 18 | 17 | 27 |
| Eosinophils | 0 | 0 | 0 | 0 | 0 | 0 | 0 |
| Smear | Neutrophils | 9 | 10 | 11 | 9 | 10 | 10 | 14 | 2 |
| Mast cells | 0 | 0 | 0 | 0 | 0 | 0 | 0 |
| Lymphocytes | 43 | 48 | 49 | 45 | 44 | 46 | 66 |
| Macrophages | 16 | 14 | 15 | 13 | 14 | 14 | 20 |
| Eosinophils | 0 | 0 | 0 | 0 | 0 | 0 | 0 |
| **Horse 5** | | **1st field** | **2nd field** | **3rd field** | **4th field** | **5th field** | **Mean** | **%** | **Mucus** |
| Cytospin | Neutrophils | 71 | 65 | 76 | 70 | 69 | 70 | 64 | 2 |
| Mast cells | 0 | 0 | 0 | 0 | 0 | 0 | 0 |
| Lymphocytes | 24 | 22 | 25 | 22 | 22 | 23 | 21 |
| Macrophages | 17 | 14 | 16 | 16 | 17 | 16 | 15 |
| Eosinophils | 0 | 0 | 0 | 0 | 0 | 0 | 0 |
| Smear | Neutrophils | 80 | 86 | 91 | 101 | 81 | 88 | 75 | 3 |
| Mast cells | 0 | 0 | 0 | 0 | 0 | 0 | 0 |
| Lymphocytes | 20 | 18 | 18 | 25 | 19 | 20 | 17 |
| Macrophages | 11 | 7 | 7 | 16 | 6 | 9 | 8 |
| Eosinophils | 0 | 0 | 0 | 0 | 1 | 0.2 | 0 |
| **Horse 6** | | **1st field** | **2nd field** | **3rd field** | **4th field** | **5th field** | **Mean** | **%** | **Mucus** |
| Cytospin | Neutrophils | 20 | 24 | 23 | 25 | 28 | 24 | 24 | 1 |
| Mast cells | 0 | 1 | 0 | 1 | 0 | 0.4 | 0 |
| Lymphocytes | 44 | 40 | 48 | 44 | 42 | 44 | 43 |
| Macrophages | 32 | 32 | 30 | 39 | 34 | 33 | 33 |
| Eosinophils | 0 | 0 | 0 | 0 | 0 | 0 | 0 |
| Smear | Neutrophils | 22 | 12 | 8 | 10 | 9 | 12 | 17 | 2 |
| Mast cells | 0 | 0 | 0 | 0 | 0 | 0 | 0 |
| Lymphocytes | 22 | 12 | 16 | 9 | 10 | 14 | 20 |
| Macrophages | 47 | 38 | 44 | 43 | 47 | 44 | 63 |
| Eosinophils | 0 | 0 | 0 | 0 | 0 | 0 | 0 |

**Table S6**. Raw data of cytocentrifugate and smear cell count results at T5.

| **T5** | | | | | | | | | |
| --- | --- | --- | --- | --- | --- | --- | --- | --- | --- |
| **Horse 1** | | **1st field** | **2nd field** | **3rd field** | **4th field** | **5th field** | **Mean** | **%** | **Mucus** |
| Cytospin | Neutrophils | 115 | 102 | 128 | 136 | 120 | 120 | 82 | 3 |
| Mast cells | 0 | 0 | 0 | 0 | 0 | 0 | 0 |
| Lymphocytes | 20 | 17 | 19 | 20 | 21 | 19 | 13 |
| Macrophages | 5 | 7 | 8 | 7 | 8 | 7 | 5 |
| Eosinophils | 0 | 0 | 0 | 0 | 0 | 0 | 0 |
| Smear | Neutrophils | 73 | 108 | 125 | 122 | 149 | 115 | 76 | 3 |
| Mast cells | 0 | 0 | 0 | 0 | 0 | 0 | 0 |
| Lymphocytes | 7 | 25 | 38 | 33 | 40 | 29 | 19 |
| Macrophages | 7 | 5 | 9 | 6 | 13 | 8 | 5 |
| Eosinophils | 0 | 0 | 0 | 0 | 0 | 0 | 0 |
| **Horse 2** | | **1st field** | **2nd field** | **3rd field** | **4th field** | **5th field** | **Mean** | **%** | **Mucus** |
| Cytospin | Neutrophils | 16 | 32 | 35 | 35 | 17 | 27 | 40 | 1 |
| Mast cells | 0 | 0 | 0 | 0 | 0 | 0 | 0 |
| Lymphocytes | 22 | 26 | 28 | 37 | 28 | 28 | 42 |
| Macrophages | 13 | 11 | 15 | 11 | 10 | 12 | 18 |
| Eosinophils | 0 | 0 | 0 | 0 | 0 | 0 | 0 |
| Smear | Neutrophils | 45 | 36 | 35 | 29 | 33 | 36 | 34 | 3 |
| Mast cells | 1 | 0 | 0 | 0 | 0 | 0.2 | 0 |
| Lymphocytes | 73 | 45 | 40 | 35 | 42 | 47 | 45 |
| Macrophages | 22 | 27 | 23 | 26 | 18 | 23 | 21 |
| Eosinophils | 0 | 0 | 0 | 0 | 0 | 0 | 0 |
| **Horse 3** | | **1st field** | **2nd field** | **3rd field** | **4th field** | **5th field** | **Mean** | **%** | **Mucus** |
| Cytospin | Neutrophils | 134 | 127 | 128 | 120 | 111 | 124 | 54 | 3 |
| Mast cells | 0 | 0 | 1 | 1 | 0 | 0.4 | 0 |
| Lymphocytes | 62 | 48 | 32 | 46 | 31 | 44 | 19 |
| Macrophages | 63 | 65 | 58 | 60 | 63 | 62 | 27 |
| Eosinophils | 0 | 0 | 0 | 0 | 0 | 0 | 0 |
| Smear | Neutrophils | 82 | 64 | 87 | 82 | 79 | 79 | 49 | 3 |
| Mast cells | 0 | 0 | 0 | 0 | 0 | 0 | 0 |
| Lymphocytes | 35 | 41 | 44 | 25 | 47 | 38 | 24 |
| Macrophages | 50 | 44 | 38 | 51 | 35 | 44 | 27 |
| Eosinophils | 0 | 0 | 0 | 1 | 0 | 0.2 | 0 |
| **Horse 4** | | **1st field** | **2nd field** | **3rd field** | **4th field** | **5th field** | **Mean** | **%** | **Mucus** |
| Cytospin | Neutrophils | 22 | 33 | 25 | 28 | 35 | 39 | 76 | 1 |
| Mast cells | 0 | 0 | 0 | 0 | 0 | 0 | 0 |
| Lymphocytes | 9 | 5 | 12 | 5 | 6 | 7 | 19 |
| Macrophages | 3 | 1 | 4 | 1 | 2 | 2 | 5 |
| Eosinophils | 0 | 0 | 0 | 0 | 0 | 0 | 0 |
| Smear | Neutrophils | 125 | 139 | 149 | 130 | 112 | 131 | 82 | 3 |
| Mast cells | 0 | 0 | 0 | 0 | 0 | 0 | 0 |
| Lymphocytes | 11 | 17 | 15 | 19 | 19 | 16 | 10 |
| Macrophages | 7 | 12 | 9 | 15 | 16 | 12 | 8 |
| Eosinophils | 0 | 0 | 0 | 0 | 0 | 0 | 0 |
| **Horse 5** | | **1st field** | **2nd field** | **3rd field** | **4th field** | **5th field** | **Mean** | **%** | **Mucus** |
| Cytospin | Neutrophils | 13 | 15 | 9 | 9 | 10 | 11 | 39 | 3 |
| Mast cells | 0 | 0 | 0 | 0 | 0 | 0 | 0 |
| Lymphocytes | 12 | 10 | 11 | 10 | 11 | 11 | 39 |
| Macrophages | 7 | 7 | 6 | 5 | 7 | 6 | 21 |
| Eosinophils | 0 | 0 | 1 | 0 | 0 | 0.2 | 1 |
| Smear | Neutrophils | 59 | 45 | 51 | 59 | 50 | 53 | 70 | 3 |
| Mast cells | 0 | 0 | 0 | 0 | 0 | 0 | 0 |
| Lymphocytes | 10 | 8 | 7 | 8 | 15 | 10 | 13 |
| Macrophages | 12 | 13 | 17 | 15 | 10 | 13 | 17 |
| Eosinophils | 0 | 0 | 0 | 0 | 0 | 0 | 0 |
| **Horse 6** | | **1st field** | **2nd field** | **3rd field** | **4th field** | **5th field** | **Mean** | **%** | **Mucus** |
| Cytospin | Neutrophils | 35 | 28 | 32 | 33 | 34 | 32 | 15 | 2 |
| Mast cells | 0 | 0 | 0 | 0 | 0 | 0 | 0 |
| Lymphocytes | 99 | 102 | 95 | 92 | 100 | 98 | 46 |
| Macrophages | 90 | 82 | 78 | 79 | 87 | 83 | 39 |
| Eosinophils | 0 | 0 | 0 | 0 | 0 | 0 | 0 |
| Smear | Neutrophils | 23 | 10 | 14 | 10 | 16 | 15 | 17 | 3 |
| Mast cells | 0 | 0 | 0 | 0 | 0 | 0 | 0 |
| Lymphocytes | 38 | 30 | 44 | 51 | 61 | 45 | 49 |
| Macrophages | 24 | 25 | 35 | 32 | 37 | 31 | 34 |
| Eosinophils | 0 | 0 | 0 | 0 | 0 | 0 | 0 |

**Table S7**. Raw data of cytocentrifugate and smear cell count results at T6.

| **T6** | | | | | | | | | |
| --- | --- | --- | --- | --- | --- | --- | --- | --- | --- |
| **Horse 1** | | **1st field** | **2nd field** | **3rd field** | **4th field** | **5th field** | **Mean** | **%** | **Mucus** |
| Cytospin | Neutrophils | 39 | 43 | 47 | 46 | 44 | 44 | 68 | 2 |
| Mast cells | 0 | 1 | 0 | 1 | 0 | 0.4 | 1 |
| Lymphocytes | 14 | 12 | 11 | 14 | 12 | 13 | 20 |
| Macrophages | 10 | 6 | 4 | 6 | 7 | 7 | 11 |
| Eosinophils | 0 | 0 | 0 | 0 | 0 | 0 | 0 |
| Smear | Neutrophils | 78 | 86 | 75 | 96 | 104 | 88 | 68 | 3 |
| Mast cells | 0 | 0 | 0 | 0 | 0 | 0 | 0 |
| Lymphocytes | 24 | 33 | 26 | 37 | 33 | 31 | 24 |
| Macrophages | 10 | 9 | 11 | 15 | 9 | 11 | 8 |
| Eosinophils | 0 | 0 | 0 | 0 | 0 | 0 | 0 |
| **Horse 2** | | **1st field** | **2nd field** | **3rd field** | **4th field** | **5th field** | **Mean** | **%** | **Mucus** |
| Cytospin | Neutrophils | 55 | 46 | 49 | 57 | 62 | 54 | 55 | 1 |
| Mast cells | 0 | 0 | 1 | 0 | 0 | 0.2 | 0 |
| Lymphocytes | 36 | 25 | 31 | 32 | 29 | 31 | 32 |
| Macrophages | 8 | 19 | 12 | 16 | 11 | 13 | 13 |
| Eosinophils | 85 | 79 | 102 | 93 | 97 | 91 | 75 |
| Smear | Neutrophils | 0 | 0 | 0 | 0 | 0 | 0 | 0 | 3 |
| Mast cells | 18 | 19 | 12 | 18 | 13 | 16 | 13 |
| Lymphocytes | 27 | 9 | 12 | 10 | 11 | 14 | 12 |
| Macrophages | 27 | 9 | 12 | 10 | 11 | 14 | 12 |
| Eosinophils | 0 | 0 | 0 | 0 | 0 | 0 | 0 |
| **Horse 3** | | **1st field** | **2nd field** | **3rd field** | **4th field** | **5th field** | **Mean** | **%** | **Mucus** |
| Cytospin | Neutrophils | 161 | 135 | 150 | 168 | 155 | 154 | 58 | 2 |
| Mast cells | 0 | 0 | 0 | 0 | 0 | 0 | 0 |
| Lymphocytes | 42 | 33 | 39 | 49 | 45 | 42 | 16 |
| Macrophages | 75 | 68 | 65 | 71 | 67 | 69 | 26 |
| Eosinophils | 0 | 0 | 0 | 0 | 0 | 0 | 0 |
| Smear | Neutrophils | 151 | 192 | 198 | 191 | 145 | 175 | 58 | 3 |
| Mast cells | 0 | 0 | 0 | 0 | 0 | 0 | 0 |
| Lymphocytes | 37 | 44 | 35 | 46 | 40 | 40 | 13 |
| Macrophages | 82 | 95 | 84 | 102 | 78 | 88 | 29 |
| Eosinophils | 0 | 0 | 0 | 0 | 0 | 0 | 0 |
| **Horse 4** | | **1st field** | **2nd field** | **3rd field** | **4th field** | **5th field** | **Mean** | **%** | **Mucus** |
| Cytospin | Neutrophils | 8 | 12 | 7 | 8 | 7 | 8 | 11 | 1 |
| Mast cells | 0 | 0 | 0 | 0 | 0 | 0 | 0 |
| Lymphocytes | 41 | 46 | 40 | 45 | 43 | 43 | 57 |
| Macrophages | 24 | 20 | 23 | 22 | 24 | 23 | 32 |
| Eosinophils | 0 | 0 | 0 | 0 | 0 | 0 | 0 |
| Smear | Neutrophils | 12 | 12 | 14 | 10 | 12 | 12 | 10 | 2 |
| Mast cells | 0 | 0 | 0 | 0 | 0 | 0 | 0 |
| Lymphocytes | 63 | 59 | 60 | 68 | 69 | 64 | 54 |
| Macrophages | 52 | 44 | 42 | 40 | 38 | 43 | 36 |
| Eosinophils | 0 | 0 | 0 | 0 | 0 | 0 | 0 |
| **Horse 5** | | **1st field** | **2nd field** | **3rd field** | **4th field** | **5th field** | **Mean** | **%** | **Mucus** |
| Cytospin | Neutrophils | 18 | 25 | 15 | 11 | 29 | 20 | 28 | 2 |
| Mast cells | 1 | 2 | 3 | 2 | 3 | 2 | 3 |
| Lymphocytes | 13 | 23 | 36 | 40 | 38 | 30 | 43 |
| Macrophages | 25 | 14 | 24 | 12 | 15 | 18 | 26 |
| Eosinophils | 0 | 0 | 0 | 0 | 0 | 0 | 0 |
| Smear | Neutrophils | 171 | 194 | 165 | 201 | 183 | 183 | 62 | 3 |
| Mast cells | 0 | 0 | 0 | 0 | 0 | 0 | 0 |
| Lymphocytes | 79 | 84 | 77 | 81 | 89 | 82 | 28 |
| Macrophages | 31 | 29 | 28 | 33 | 30 | 30 | 10 |
| Eosinophils | 0 | 0 | 0 | 0 | 0 | 0 | 0 |
| **Horse 6** | | **1st field** | **2nd field** | **3rd field** | **4th field** | **5th field** | **Mean** | **%** | **Mucus** |
| Cytospin | Neutrophils | 95 | 121 | 115 | 98 | 100 | 106 | 45 | 2 |
| Mast cells | 2 | 0 | 0 | 0 | 0 | 0.4 | 0 |
| Lymphocytes | 69 | 72 | 60 | 74 | 98 | 75 | 32 |
| Macrophages | 53 | 56 | 50 | 42 | 70 | 54 | 23 |
| Eosinophils | 0 | 0 | 0 | 0 | 0 | 0 | 0 |
| Smear | Neutrophils | 125 | 118 | 100 | 135 | 115 | 119 | 62 | 3 |
| Mast cells | 0 | 0 | 0 | 0 | 0 | 0 | 0 |
| Lymphocytes | 44 | 42 | 40 | 50 | 59 | 47 | 25 |
| Macrophages | 33 | 26 | 18 | 27 | 20 | 25 | 13 |
| Eosinophils | 0 | 0 | 0 | 0 | 0 | 0 | 0 |

**Table S8**. Raw data of cytocentrifugate and smear cell count results at T7.

| **T7** | | | | | | | | | |
| --- | --- | --- | --- | --- | --- | --- | --- | --- | --- |
| **Horse 1** | | **1st field** | **2nd field** | **3rd field** | **4th field** | **5th field** | **Mean** | **%** | **Mucus** |
| Cytospin | Neutrophils | 41 | 51 | 49 | 44 | 47 | 46 | 66 | 2 |
| Mast cells | 0 | 1 | 0 | 0 | 0 | 0.2 | 0 |
| Lymphocytes | 11 | 15 | 15 | 16 | 14 | 14 | 20 |
| Macrophages | 9 | 10 | 11 | 10 | 8 | 10 | 14 |
| Eosinophils | 0 | 0 | 0 | 0 | 0 | 0 | 0 |
| Smear | Neutrophils | bd | bd | bd | bd | bd | bd | bd | bd |
| Mast cells | bd | bd | bd | bd | bd | bd | bd |
| Lymphocytes | bd | bd | bd | bd | bd | bd | bd |
| Macrophages | bd | bd | bd | bd | bd | bd | bd |
| Eosinophils | bd | bd | bd | bd | bd | bd | bd |
| **Horse 2** | | **1st field** | **2nd field** | **3rd field** | **4th field** | **5th field** | **Mean** | **%** | **Mucus** |
| Cytospin | Neutrophils | 55 | 59 | 60 | 58 | 63 | 59 | 58 | 2 |
| Mast cells | 0 | 0 | 0 | 0 | 0 | 0 | 0 |
| Lymphocytes | 29 | 32 | 35 | 27 | 28 | 30 | 30 |
| Macrophages | 8 | 12 | 10 | 18 | 11 | 12 | 12 |
| Eosinophils | 0 | 0 | 0 | 0 | 0 | 0 | 0 |
| Smear | Neutrophils | 65 | 85 | 79 | 82 | 84 | 79 | 45 | 3 |
| Mast cells | 0 | 0 | 0 | 0 | 0 | 0 | 0 |
| Lymphocytes | 54 | 47 | 58 | 49 | 47 | 51 | 29 |
| Macrophages | 52 | 48 | 43 | 49 | 42 | 47 | 26 |
| Eosinophils | 0 | 0 | 0 | 0 | 0 | 0 | 0 |
| **Horse 3** | | **1st field** | **2nd field** | **3rd field** | **4th field** | **5th field** | **Mean** | **%** | **Mucus** |
| Cytospin | Neutrophils | 89 | 93 | 91 | 87 | 82 | 88 | 42 | 2 |
| Mast cells | 0 | 0 | 0 | 0 | 0 | 0 | 0 |
| Lymphocytes | 61 | 72 | 69 | 71 | 75 | 70 | 33 |
| Macrophages | 52 | 57 | 50 | 48 | 55 | 52 | 25 |
| Eosinophils | 0 | 0 | 0 | 0 | 0 | 0 | 0 |
| Smear | Neutrophils | 82 | 85 | 87 | 90 | 82 | 85 | 41 | 2 |
| Mast cells | 0 | 0 | 0 | 0 | 0 | 0 | 0 |
| Lymphocytes | 52 | 60 | 61 | 50 | 62 | 57 | 27 |
| Macrophages | 70 | 63 | 74 | 64 | 58 | 66 | 32 |
| Eosinophils | 0 | 0 | 0 | 0 | 0 | 0 | 0 |
| **Horse 4** | | **1st field** | **2nd field** | **3rd field** | **4th field** | **5th field** | **Mean** | **%** | **Mucus** |
| Cytospin | Neutrophils | 40 | 49 | 48 | 50 | 52 | 48 | 31 | 2 |
| Mast cells | 0 | 0 | 0 | 0 | 0 | 0 | 0 |
| Lymphocytes | 66 | 60 | 55 | 65 | 67 | 63 | 40 |
| Macrophages | 38 | 42 | 49 | 49 | 50 | 46 | 29 |
| Eosinophils | 0 | 0 | 0 | 0 | 0 | 0 | 0 |
| Smear | Neutrophils | bd | bd | bd | bd | bd | bd | bd | Bd |
| Mast cells | bd | bd | bd | bd | bd | bd | bd |
| Lymphocytes | bd | bd | bd | bd | bd | bd | bd |
| Macrophages | bd | bd | bd | bd | bd | bd | bd |
| Eosinophils | bd | bd | bd | bd | bd | bd | bd |
| **Horse 5** | | **1st field** | **2nd field** | **3rd field** | **4th field** | **5th field** | **Mean** | **%** | **Mucus** |
| Cytospin | Neutrophils | 81 | 75 | 89 | 91 | 7 | 83 | 73 | 3 |
| Mast cells | 1 | 0 | 0 | 0 | 0 | 0.2 | 0 |
| Lymphocytes | 15 | 13 | 23 | 22 | 21 | 19 | 17 |
| Macrophages | 9 | 11 | 13 | 9 | 12 | 11 | 10 |
| Eosinophils | 0 | 0 | 0 | 0 | 0 | 0 | 0 |
| Smear | Neutrophils | 68 | 85 | 88 | 94 | 75 | 82 | 65 | 3 |
| Mast cells | 0 | 0 | 0 | 0 | 0 | 0 | 0 |
| Lymphocytes | 22 | 19 | 18 | 26 | 25 | 22 | 18 |
| Macrophages | 19 | 25 | 22 | 21 | 18 | 21 | 17 |
| Eosinophils | 0 | 0 | 0 | 0 | 0 | 0 | 0 |
| **Horse 6** | | **1st field** | **2nd field** | **3rd field** | **4th field** | **5th field** | **Mean** | **%** | **Mucus** |
| Cytospin | Neutrophils | 22 | 26 | 33 | 35 | 32 | 30 | 28 | 2 |
| Mast cells | 0 | 0 | 0 | 0 | 0 | 0 | 0 |
| Lymphocytes | 50 | 48 | 50 | 52 | 54 | 51 | 48 |
| Macrophages | 33 | 25 | 25 | 22 | 25 | 26 | 24 |
| Eosinophils | 0 | 0 | 0 | 0 | 0 | 0 | 0 |
| Smear | Neutrophils | 44 | 47 | 42 | 48 | 52 | 47 | 25 | 2 |
| Mast cells | 0 | 0 | 0 | 0 | 0 | 0 | 0 |
| Lymphocytes | 32 | 87 | 91 | 85 | 94 | 78 | 42 |
| Macrophages | 62 | 56 | 60 | 58 | 65 | 60 | 32 |
| Eosinophils | 0 | 0 | 0 | 0 | 0 | 0 | 0 |
